# Supplementary material
Source: PubMed Central journal article supplement (PMC5942183)
Supplement: NIHMS962734-supplement-Supplemental.pdf [file NIHMS962734-supplement-Supplemental.pdf]

| <b>Supplemental Table 1: Examples of genes that promote lineage plasticity and cancer</b> |                                                                                                                                                                                                                                                                                                        |                                                                                                                                                                                                                              |
|-------------------------------------------------------------------------------------------|--------------------------------------------------------------------------------------------------------------------------------------------------------------------------------------------------------------------------------------------------------------------------------------------------------|------------------------------------------------------------------------------------------------------------------------------------------------------------------------------------------------------------------------------|
| <b>Gene name</b>                                                                          | <b>Roles in homeostasis and cancer</b>                                                                                                                                                                                                                                                                 | <b>Selected references</b>                                                                                                                                                                                                   |
| <i>Homeobox transcriptional regulatory genes</i>                                          |                                                                                                                                                                                                                                                                                                        |                                                                                                                                                                                                                              |
| <i>CDX2</i>                                                                               | Expressed in intestinal epithelium and promotes its differentiation; dysregulation leads to colon cancer; principal driver of Barrett’s metaplasia                                                                                                                                                     | ( <a href="#">Strumpf et al. 2005</a> ,<br><a href="#">Colleypriest et al. 2010</a> )                                                                                                                                        |
| <i>NKX2.1</i>                                                                             | Expressed in lung epithelium and promotes its differentiation; dysregulation leads to lung cancer; represses a gastric phenotype in lung epithelium                                                                                                                                                    | ( <a href="#">Winslow et al. 2011</a> ,<br><a href="#">Snyder et al. 2013</a> )                                                                                                                                              |
| <i>NKX3.1</i>                                                                             | Expressed in luminal prostatic epithelial cells; forced expression in non-prostatic cells leads to transdifferentiation to prostate; master regulator for reprogramming to prostate; dysregulation leads to prostate cancer                                                                            | ( <a href="#">Dutta et al. 2016</a> ,<br><a href="#">Taloz et al. 2017</a> ,<br><a href="#">Abate-Shen et al. 2008</a> )                                                                                                     |
| <i>PDX1</i>                                                                               | Expressed in endodermal cells that give rise to pancreas; forced expression in non-pancreatic cells leads to transdifferentiation to pancreatic cells; reprograms pancreatic exocrine cells to the endocrine cells; dysregulated in a stage-specific manner in pancreatic cancer                       | ( <a href="#">Horb et al. 2003</a> ,<br><a href="#">Zhou et al. 2008</a> ,<br><a href="#">Roy et al. 2016</a> )                                                                                                              |
| <i>PAX4</i>                                                                               | Expressed in pancreas during development and essential for specification of insulin-producing $\beta$ cells; forced expression in pancreatic progenitor cells promotes their conversion to $\beta$ cells                                                                                               | ( <a href="#">Collombat et al. 2009</a> ,<br><a href="#">Sosa-Pineda et al. 1997</a> )                                                                                                                                       |
| <i>OCT4</i>                                                                               | Expressed in pluripotent cells in the developing embryo; promotes pluripotency and reprogramming; ectopic expression leads to dysplasia                                                                                                                                                                | ( <a href="#">Takahashi et al. 2007</a> ,<br><a href="#">Takahashi &amp; Yamanaka 2006</a> ,<br><a href="#">Hochedlinger et al. 2005</a> )                                                                                   |
| <i>SOX transcriptional regulatory genes</i>                                               |                                                                                                                                                                                                                                                                                                        |                                                                                                                                                                                                                              |
| <i>SOX2</i>                                                                               | Expressed in pluripotent cells in the developing embryo; promotes pluripotency and reprogramming; forced expression in lung promotes cancer; driver of lineage plasticity in prostate cancers arising from loss-of-function of <i>RB</i> and <i>TP53</i> , particularly in contexts of drug resistance | ( <a href="#">Sarkar &amp; Hochedlinger 2013</a> ,<br><a href="#">Takahashi et al. 2007</a> ,<br><a href="#">Takahashi &amp; Yamanaka 2006</a> ,<br><a href="#">Ferone et al. 2016</a> ,<br><a href="#">Mu et al. 2017</a> ) |

|                                        |                                                                                                                                                                                                                     |                                                                                                                                                                                                                        |
|----------------------------------------|---------------------------------------------------------------------------------------------------------------------------------------------------------------------------------------------------------------------|------------------------------------------------------------------------------------------------------------------------------------------------------------------------------------------------------------------------|
| <i>SOX9</i>                            | Expressed in pancreatic progenitors during development; promotes pancreatic metaplasia; acts coordinately with <i>SOX2</i> to promote EMT in lung cancer                                                            | ( <a href="#">Kopp et al. 2011</a> , <a href="#">Lin et al. 2016</a> )                                                                                                                                                 |
| <i>SOX11</i>                           | Expressed during neuronal development; promotes lineage plasticity in prostate cancers arising from loss-of-function of <i>PTEN</i> and <i>TP53</i> , particularly in contexts of drug resistance                   | ( <a href="#">Bergsland et al. 2011</a> , <a href="#">Zou et al. 2017</a> )                                                                                                                                            |
| Other transcriptional regulatory genes |                                                                                                                                                                                                                     |                                                                                                                                                                                                                        |
| <i>KIF4</i>                            | A member of the Krüppel-like transcription factor family; promotes pluripotency and reprogramming; collaborates with <i>Kras</i> to promote cellular reprogramming in pancreatic cancer initiation                  | ( <a href="#">Takahashi et al. 2007</a> , <a href="#">Takahashi &amp; Yamanaka 2006</a> , <a href="#">Wei et al. 2016</a> )                                                                                            |
| <i>MITF</i>                            | Member of the basic helix-loop-helix leucine zipper transcription factor family; required for survival and specification of melanocytes; driver of “phenotype switching” and drug resistance in metastatic melanoma | ( <a href="#">Hoek et al. 2008</a> , <a href="#">Konieczkowski et al. 2014</a> )                                                                                                                                       |
| <i>AR</i>                              | Essential regulator of prostate differentiation; master regulator for reprogramming to prostate; among the most frequently dysregulated gene in prostate cancer                                                     | ( <a href="#">Talos et al. 2017</a> , <a href="#">Watson et al. 2015</a> )                                                                                                                                             |
| <i>Oncogenes</i>                       |                                                                                                                                                                                                                     |                                                                                                                                                                                                                        |
| <i>MYC</i>                             | Promotes pluripotency and reprogramming; collaborates with <i>Kras</i> to reprogram primary (non-tumorigenic) cells to metastatic cells                                                                             | ( <a href="#">Takahashi et al. 2007</a> , <a href="#">Takahashi &amp; Yamanaka 2006</a> , <a href="#">Ischenko et al. 2013</a> )                                                                                       |
| <i>KRAS</i>                            | Cooperates with <i>SOX9</i> in metaplasia of pancreatic adenocarcinoma; cooperates with <i>Myc</i> in reprogramming to metastatic cells                                                                             | ( <a href="#">Kopp et al. 2011</a> , <a href="#">Ischenko et al. 2013</a> )                                                                                                                                            |
| <i>Tumor suppressor genes</i>          |                                                                                                                                                                                                                     |                                                                                                                                                                                                                        |
| <i>TP53</i>                            | Inhibits induced pluripotency and reprogramming; collaborates with <i>RB</i> and <i>PTEN</i> in promoting plasticity in several cancer types, including prostate cancer in contexts of drug resistance              | ( <a href="#">Marion et al. 2009</a> , <a href="#">Utikal et al. 2009</a> , <a href="#">Yi et al. 2012</a> , <a href="#">Kawamura et al. 2009</a> , <a href="#">Zou et al. 2017</a> , <a href="#">Mu et al. 2017</a> ) |

|             |                                                                                                                                                                           |                                                  |
|-------------|---------------------------------------------------------------------------------------------------------------------------------------------------------------------------|--------------------------------------------------|
| <i>RB</i>   | Collaborates with <i>TP53</i> in conversion of adenocarcinoma to neuroendocrine differentiation in lung and prostate cancer, particularly in contexts of drug resistance  | <a href="#">(Mu et al. 2017, Ku et al. 2017)</a> |
| <i>PTEN</i> | Collaborates with <i>TP53</i> in transdifferentiation of adenocarcinoma to neuroendocrine differentiation in prostate cancer, particularly in contexts of drug resistance | <a href="#">(Zou et al. 2017)</a>                |
